# Supplementary material for: Single-cell assessment of transcriptome alterations induced by Scriptaid in early differentiated human haematopoietic progenitors during ex vivo expansion
Source: PubMed Central journal article supplement (PMC6438964; doi:10.1038/s41598-019-41803-z), 2019-03-28

## Supplementary Information

### Single-cell assessment of transcriptome alterations induced by Scriptaid in early differentiated human haematopoietic progenitors during *ex vivo* expansion

Peng Hua<sup>1,2</sup>, Barbara Kronsteiner<sup>2</sup>, Mark van der Garde<sup>2</sup>, Neil Ashley<sup>1</sup>, Diana Hernandez<sup>3</sup>, Marina Tarunina<sup>3</sup>, Lilian Hook<sup>3</sup>, Yen Choo<sup>3</sup>, Irene Roberts<sup>1,4,5</sup>, Adam Mead<sup>1,5</sup> and Suzanne M. Watt<sup>2</sup>.

<sup>1</sup>MRC Molecular Haematology Unit, Weatherall Institute of Molecular Medicine, Radcliffe Department of Medicine, University of Oxford, John Radcliffe Hospital, Oxford, OX3 9DS, UK; <sup>2</sup>Stem Cell Research, Nuffield Division of Clinical Laboratory Sciences, Radcliffe Department of Medicine, University of Oxford, and NHS Blood and Transplant, John Radcliffe Hospital, Oxford, OX3 9BQ, UK; <sup>3</sup>Plasticell Ltd, Stevenage Bioscience Catalyst, Stevenage, SG1 2FX, UK; <sup>4</sup>Department of Paediatrics, University of Oxford, Children's Hospital, John Radcliffe Hospital, Oxford OX3 9DU, UK; <sup>5</sup>Haematology Theme, Oxford Biomedical Research Centre, Oxford University Hospitals, Oxford, UK.

**Statement of equal author contribution:** P.H. and B.K. contributed equally to this study.

## Supplementary Tables

**Supplementary Table S1. Taqman probes used for Biomark Single-cell qPCR:**

| Reference genes                         | Annotation                                                                         | TAQMAN id        |
|-----------------------------------------|------------------------------------------------------------------------------------|------------------|
| <i>BMI1</i> (HSC)                       | BMI1 Proto-Oncogene, Polycomb Ring Finger                                          | Hs00995536_m1    |
| <i>FLT3</i> (HSC)                       | fms-related tyrosine kinase 3                                                      | Hs00975643_m1    |
| <i>GFI1</i> (HSC/homing)                | Growth Factor Independent 1 Transcriptional Repressor                              | Hs00382207_m1    |
| <i>HMG2</i> (HSC/fetal)                 | High-Mobility Group (Nonhistone Chromosomal) Protein Isoform I-C                   | Hs04397751_m1    |
| <i>ITGA6</i> (HSC)                      | Integrin Subunit Alpha 6 (CD49f)                                                   | Hs01116228_m1    |
| <i>JUN</i> (HSC)                        | Jun Proto-Oncogene, AP-1 Transcription Factor Subunit                              | Hs01103582_s1    |
| <i>MCL1</i> (HSC)                       | Myeloid Cell Leukemia Sequence 1 (BCL2-Related)                                    | Hs01050896_m1    |
| <i>MEIS1</i> (HSC)                      | Meis homeobox 1                                                                    | Hs00180020_m1    |
| <i>MPL</i> (HSC)                        | myeloproliferative leukemia virus oncogene                                         | Hs00180489_m1    |
| <i>MYB</i> (HSC)                        | Proto-Oncogene C-Myb                                                               | Hs00920556_m1    |
| <i>MYC</i> (HSC)                        | V-Myc Avian Myelocytomatosis Viral Oncogene Homolog                                | Hs00153408_m1    |
| <i>MYCN</i> (HSC)                       | V-Myc Avian Myelocytomatosis Viral Oncogene Neuroblastoma Derived Homolog          | Hs00232074_m1    |
| <i>POU5F1</i> (HSC)                     | Oct-04                                                                             | Hs00999634_gH    |
| <i>STAT5a</i> (HSC)                     | Transcription Factor STAT5A                                                        | Hs00559648_g1    |
| <i>STAT5b</i> (HSC)                     | Transcription Factor STAT5B                                                        | Hs00560026_m1    |
| <i>CD79A</i> (Lymphoid)                 | Membrane-Bound Immunoglobulin-Associated Protein                                   | Hs00998119_m1    |
| <i>EBF1</i> (Lymphoid)                  | Early B-Cell Factor 1                                                              | Hs01092694_m1    |
| <i>GATA3</i> (Lymphoid)                 | Trans-Acting T-Cell-Specific Transcription Factor GATA-3                           | Hs00231122_m1    |
| <i>IL3RA</i> (Lymphoid)                 | Interleukin-3 Receptor Subunit Alpha                                               | Hs00608141_m1    |
| <i>PAX5</i> (Lymphoid)                  | B-Cell Lineage Specific Activator                                                  | Hs00277134_m1    |
| <i>PTCRA</i> (Lymphoid)                 | Pre T-Cell Antigen Receptor Alpha                                                  | Hs00300125_m1    |
| <i>RAG1</i> (Lymphoid)                  | Recombination Activating Protein 1                                                 | Hs00172121_m1    |
| <i>CEBPA</i> (Myeloid)                  | CCAAT/Enhancer Binding Protein Alpha                                               | Hs00269972_s1    |
| <i>CSF3R</i> (Myeloid)                  | Colony Stimulating Factor 3 Receptor                                               | Hs01114420_m1    |
| <i>MPO</i> (Myeloid)                    | myeloperoxidase                                                                    | Hs00165162_m1    |
| <i>SFPI1</i> (Myeloid/ HSC)             | Hematopoietic Transcription Factor PU.1                                            | Hs02786711_m1    |
| <i>EPOR</i> (Erythroid)                 | Erythropoietin Receptor                                                            | Hs00959426_m1    |
| <i>GATA1</i> (Erythroid)                | GATA Binding Protein 1 (Globin Transcription Factor 1)                             | Hs01085823_m1    |
| <i>KLF1</i> (Erythroid)                 | Erythroid-Specific Transcription Factor EKLF                                       | Hs00610592_m1    |
| <i>VWF</i> (Platelet)                   | Coagulation Factor VIII VWF                                                        | Hs01109457_m1    |
| <i>CXCR4</i> (homing/retention)         | chemokine (C-X-C motif) receptor 4                                                 | Hs00976734_m1    |
| <i>GAS2</i> (Cell growth)               | growth arrest-specific 2                                                           | Hs00169477_m1    |
| <i>ASF1A</i> (epigenetic)               | ASF1 Anti-Silencing Function 1 Homolog A                                           | Hs00204044_m1    |
| <i>CHD7</i> (epigenetic)                | Chromodomain Helicase DNA Binding Protein 7                                        | Hs00215010_m1    |
| <i>GAPDH</i> (House-keeping)            | glyceraldehyde-3-phosphate dehydrogenase                                           | Hs02758991_g1    |
| <b>Genes upregulated in CD90+ cells</b> | <b>Annotation</b>                                                                  | <b>TAQMAN id</b> |
| <i>C10orf128</i>                        | chromosome 10 open reading frame 128 [Source:HGNC Symbol;Acc:HGNC:27274]           | Hs01393050_m1    |
| <i>CD22</i>                             | CD22 molecule [Source:HGNC Symbol;Acc:HGNC:1643]                                   | Hs00998488_m1    |
| <i>CDCP1</i>                            | CUB domain containing protein 1 [Source:HGNC Symbol;Acc:HGNC:24357]                | Hs01080405_m1    |
| <i>CRHBP</i>                            | corticotropin releasing hormone binding protein [Source:HGNC Symbol;Acc:HGNC:2356] | Hs00181810_m1    |
| <i>EMCN</i>                             | endomucin [Source:HGNC Symbol;Acc:HGNC:16041]                                      | Hs01038204_m1    |

|                                         |                                                                                                                    |                  |
|-----------------------------------------|--------------------------------------------------------------------------------------------------------------------|------------------|
| <i>EPB41L3</i>                          | erythrocyte membrane protein band 4.1 like 3 [Source:HGNC Symbol;Acc:HGNC:3380]                                    | Hs00202360_m1    |
| <i>GBP5</i>                             | guanylate binding protein 5 [Source:HGNC Symbol;Acc:HGNC:19895]                                                    | Hs00369472_m1    |
| <i>GPAT3</i>                            | glycerol-3-phosphate acyltransferase 3 [Source:HGNC Symbol;Acc:HGNC:28157]                                         | Hs00262010_m1    |
| <i>HLF</i>                              | HLF, PAR bZIP transcription factor [Source:HGNC Symbol;Acc:HGNC:4977]                                              | Hs00171406_m1    |
| <i>KIAA0087</i>                         | KIAA0087 [Source:HGNC Symbol;Acc:HGNC:22191]                                                                       | Hs00207421_m1    |
| <i>MFAP2</i>                            | microfibrillar associated protein 2 [Source:HGNC Symbol;Acc:HGNC:7033]                                             | Hs01027737_m1    |
| <i>OAS1</i>                             | 2'-5'-oligoadenylate synthetase 1 [Source:HGNC Symbol;Acc:HGNC:8086]                                               | Hs00973635_m1    |
| <i>OAS3</i>                             | 2'-5'-oligoadenylate synthetase 3 [Source:HGNC Symbol;Acc:HGNC:8088]                                               | Hs00196324_m1    |
| <i>PDE1A</i>                            | phosphodiesterase 1A [Source:HGNC Symbol;Acc:HGNC:8774]                                                            | Hs00897273_m1    |
| <i>PROCR</i>                            | protein C receptor [Source:HGNC Symbol;Acc:HGNC:9452]                                                              | Hs00197387_m1    |
| <i>RAI14</i>                            | retinoic acid induced 14 [Source:HGNC Symbol;Acc:HGNC:14873]                                                       | Hs00210238_m1    |
| <i>SKAP1</i>                            | src kinase associated phosphoprotein 1 [Source:HGNC Symbol;Acc:HGNC:15605]                                         | Hs00175372_m1    |
| <i>SLC16A2</i>                          | solute carrier family 16 member 2 [Source:HGNC Symbol;Acc:HGNC:10923]                                              | Hs00185140_m1    |
| <i>SLC7A8</i>                           | solute carrier family 7 member 8 [Source:HGNC Symbol;Acc:HGNC:11066]                                               | Hs00794796_m1    |
| <i>TMEM200A</i>                         | transmembrane protein 200A [Source:HGNC Symbol;Acc:HGNC:21075]                                                     | Hs00287589_m1    |
| <i>TNFSF8</i>                           | tumor necrosis factor superfamily member 8 [Source:HGNC Symbol;Acc:HGNC:11938]                                     | Hs00174286_m1    |
| <i>TRIM47</i>                           | tripartite motif containing 47 [Source:HGNC Symbol;Acc:HGNC:19020]                                                 | Hs00386112_m1    |
| <i>UCHL1</i>                            | ubiquitin C-terminal hydrolase L1 [Source:HGNC Symbol;Acc:HGNC:12513]                                              | Hs00985157_m1    |
| <b>Genes upregulated in CD90- cells</b> | <b>Annotation</b>                                                                                                  | <b>TAQMAN id</b> |
| <i>ABCB6</i>                            | ATP binding cassette subfamily B member 6 (Langereis blood group) [Source:HGNC Symbol;Acc:HGNC:47]                 | Hs00180568_m1    |
| <i>APOC1</i>                            | apolipoprotein C1 [Source:HGNC Symbol;Acc:HGNC:607]                                                                | Hs00155790_m1    |
| <i>BCL2L11</i>                          | BCL2 like 11 [Source:HGNC Symbol;Acc:HGNC:994]                                                                     | Hs01076940_m1    |
| <i>CA1</i>                              | carbonic anhydrase 1 [Source:HGNC Symbol;Acc:HGNC:1368]                                                            | Hs00266139_m1    |
| <i>CD84</i>                             | CD84 molecule [Source:HGNC Symbol;Acc:HGNC:1704]                                                                   | Hs01547121_m1    |
| <i>CEBPD</i>                            | CCAAT/enhancer binding protein delta [Source:HGNC Symbol;Acc:HGNC:1835]                                            | Hs00270931_s1    |
| <i>CITED2</i>                           | Cbp/p300 interacting transactivator with Glu/Asp rich carboxy-terminal domain 2 [Source:HGNC Symbol;Acc:HGNC:1987] | Hs00366696_m1    |
| <i>CSF2RB</i>                           | colony stimulating factor 2 receptor beta common subunit [Source:HGNC Symbol;Acc:HGNC:2436]                        | Hs00166144_m1    |
| <i>CST7</i>                             | cystatin F [Source:HGNC Symbol;Acc:HGNC:2479]                                                                      | Hs00175361_m1    |
| <i>CSTA</i>                             | cystatin A [Source:HGNC Symbol;Acc:HGNC:2481]                                                                      | Hs00193257_m1    |
| <i>DLC1</i>                             | DLC1 Rho GTPase activating protein [Source:HGNC Symbol;Acc:HGNC:2897]                                              | Hs00183436_m1    |
| <i>ELL2</i>                             | elongation factor for RNA polymerase II 2 [Source:HGNC Symbol;Acc:HGNC:17064]                                      | Hs00603761_g1    |
| <i>FAM171A1</i>                         | family with sequence similarity 171 member A1 [Source:HGNC Symbol;Acc:HGNC:23522]                                  | Hs00295934_m1    |
| <i>FHL2</i>                             | four and a half LIM domains 2 [Source:HGNC Symbol;Acc:HGNC:3703]                                                   | Hs00991866_m1    |
| <i>HBA2</i>                             | hemoglobin subunit alpha 2 [Source:HGNC Symbol;Acc:HGNC:4824]                                                      | Hs00361191_g1    |
| <i>LEF1</i>                             | Lymphoid Enhancer Binding Factor 1                                                                                 | Hs01547250_m1    |
| <i>MICAL2</i>                           | microtubule associated monooxygenase, calponin and LIM domain containing 2 [Source:HGNC Symbol;Acc:HGNC:24693]     | Hs01121809_m1    |
| <i>NECTIN1</i>                          | nectin cell adhesion molecule 1 [Source:HGNC Symbol;Acc:HGNC:9706]                                                 | Hs01591978_m1    |
| <i>PLD1</i>                             | phospholipase D1 [Source:HGNC Symbol;Acc:HGNC:9067]                                                                | Hs01111342_m1    |
| <i>PRTN3</i>                            | proteinase 3 [Source:HGNC Symbol;Acc:HGNC:9495]                                                                    | Hs01553330_m1    |
| <i>PVT1</i>                             | Pvt1 oncogene (non-protein coding) [Source:HGNC Symbol;Acc:HGNC:9709]                                              | Hs00413039_m1    |
| <i>RNASE2</i>                           | ribonuclease A family member 2 [Source:HGNC Symbol;Acc:HGNC:10045]                                                 | Hs00795553_s1    |
| <i>RYR3</i>                             | ryanodine receptor 3 [Source:HGNC Symbol;Acc:HGNC:10485]                                                           | Hs00168821_m1    |
| <i>STXBP5</i>                           | syntaxin binding protein 5 [Source:HGNC Symbol;Acc:HGNC:19665]                                                     | Hs01083307_m1    |
| <i>TFR2</i>                             | transferrin receptor 2 [Source:HGNC Symbol;Acc:HGNC:11762]                                                         | Hs01056398_m1    |
| <i>TMOD1</i>                            | tropomodulin 1 [Source:HGNC Symbol;Acc:HGNC:11871]                                                                 | Hs00268513_m1    |
| <i>TSPOAP1</i>                          | TSPO associated protein 1 [Source:HGNC Symbol;Acc:HGNC:16831]                                                      | Hs00895494_m1    |

**Supplementary Table S2. Antibodies Used for Flow Cytometry**

| <b>Name</b> | <b>Clone</b> | <b>Isotype</b> | <b>Conj.</b> | <b>Company</b> | <b>Dilution</b> |
|-------------|--------------|----------------|--------------|----------------|-----------------|
| CD34        | 581          | mIgG1          | AF700        | BD             | 1:60            |
| CD38        | HIT2         | mIgG1          | PETxR/BB515  | Caltag/BD      | 1:40            |
| CD45RA      | HI100        | mIgG2bk        | APC-H7       | BD             | 1:50            |
| CD90        | 5E10         | IgG1           | PE           | Biolegend      | 1:50            |
| CD49f       | GoH3         | rIgG2a         | PE-Cy7       | Biolegend      | 1:120           |
| CD133       | 293C3        | IgG2b          | APC          | Miltenyi       | 1:30            |
| CD123       | 6H6          |                | PerCP-Cy5.5  | Biolegend      | 1:50            |
| CD2         | RPA-2.10     | IgG1           | PE-Cy5       | Biolegend      | 1:150           |
| CD3         | HIT3a        | IgG2a          | PE-Cy5       | Biolegend      | 1:200           |
| CD4         | RPA-T4       | IgG1           | PE-Cy5       | Biolegend      | 1:150           |
| CD7         | CD7-6B7      | IgG1           | PE-Cy5       | Biolegend      | 1:150           |
| CD8a        | RPA-T8       | IgG1           | PE-Cy5       | Biolegend      | 1:200           |
| CD10        | HI10a        | IgG1           | PE-Cy5       | Biolegend      | 1:80            |
| CD11b       | ICRF44       | IgG1           | PE-Cy5       | Biolegend      | 1:80            |
| CD14        | 6103         | IgG2a          | PE-Cy5       | eBio           | 1:80            |
| CD19        | HIB19        | IgG1           | PE-Cy5       | Biolegend      | 1:200           |
| CD20        | 2H7          | IgG2a          | PE-Cy5       | Biolegend      | 1:150           |
| CD56        | B159         | IgG1           | PE-Cy5       | BD             | 1:20            |
| CD235ab     | HIR2         | IgG2b          | PE-Cy5       | Biolegend      | 1:1200          |
| DAPI        |              |                | UV 440/40    |                | 100ng/ml        |

## Supplementary Figure Legends

### Supplementary Figure S1. Flow cytometric analyses for human UCB CD133+ cells expanded in vitro.

Representative gating strategy for flow cytometry analysis for day 5 cultured cells in Figures 1a1 and 1a2. The media contained C3-cytokine plus vehicle (top) or Scriptaid (bottom). Lin-CD34+CD38-/lowCD45RA- cells were gated as shown and then selected for CD90+ or CD90- cells. The CD90+ subset was further enriched for CD49f+ cells. All gating was determined by FMO (Fluorescence Minus One).

### Supplementary Figure S2. Expansion of CD133+ HSC and progenitor populations after 5 days culture with cytokines and Scriptaid or vehicle

(a) Cryopreserved CD133+ UCB cells were thawed and cultured overnight in C3-cytokine-containing serum free medium. Cells were then plated for expansion and also analysed for the frequency of HSC and progenitors. Scriptaid or vehicle was added when plating and all cells post 5-days expansion were analysed by flow cytometry. In the presence of C<sub>3</sub>-cytokines and Scriptaid, the absolute number of Lin+, LMPP and GMP cells decreased significantly compared to vehicle. Scriptaid had no effect on the numbers of committed myeloid progenitors (CMP, MEP) (\*,  $p < 0.05$ ; \*\*,  $p < 0.005$ ; \*\*\*,  $p < 0.001$ ,  $n = 6-9$ ). (b-c) Proportions of AnnexinV+DAPI- (Apoptotic) and AnnexinV+DAPI+ (Dead) cells in C<sub>3</sub>-cytokine containing medium supplemented with Scriptaid or the vehicle control did not differ on day 5 of expansion. (d-e) Median Fluorescence Intensity values of CD90-PE and CD49f-PECy7 analysed by Student's T test against vehicle control (\*\*\*,  $p < 0.001$ ; N.S,  $p = 0.05$ .  $n = 3$ ). (f) Limiting dilution analysis (LDA) for quantitating LTC-ICs present in the unexpanded Lin-CD34+CD38-CD45RA-CD90+/-CD49f+ cell subsets ( $n = 4-12$ ).

### **Supplementary Figure S3. Supporting information for RNA-sequencing and single-cell qPCR**

(a) QC of a cDNA library from 100 sorted cells using the Agilent high-sensitivity chip. (b) QC of library pool using the Agilent high-sensitivity chip. (c-d) QC of raw fastq file from hiseq4000. (e) Sample distance heatmap illustrates C1 and C2 cells cannot be clustered based on the phenotype. (f) Sample distance heatmap illustrates C1 and C4 cells can be clustered based on the phenotype but not biological variance. (g) Sample distance heatmap illustrates C1 and C3 cells cannot be clustered based on the phenotype. (h) Volcano plot demonstrating the top differentially expressed genes between C2 and C4 populations. (i) Principal Component Analysis (PCA) plotting the variance between individual cells for 50 selected DE genes. CD90-CD49f+ (C3 and C4) cells can be clearly distinguished from CD90+CD49f+ (C1 and C2) cells in both day 5 vehicle and Scriptaid expanded cell culture. (j) Screen plot of PCA analysis of Fluidigm single-cell qPCR data for 50 selected DE genes plus reference genes. (k) Screen plot of PCA analysis of Fluidigm single-cell qPCR data for 50 selected DE genes. (l) GO Biological Process analysis results of the DE genes between C2 and C4 populations.

### **Supplementary Figure S4. Transcriptome profiling of single cells**

Individually plotted relative gene expression levels of single cells (34 reference genes and 50 selected DE genes) from day 5 Scriptaid-expanded Lin-CD34+CD38-CD45RA-CD90+CD49f+ cells (C1), vehicle-expanded Lin-CD34+CD38-CD45RA-CD90+CD49f+ cells (C2), Scriptaid-expanded Lin-CD34+CD38-CD45RA-CD90-CD49f+ cells (C3), and vehicle-expanded Lin-CD34+CD38-CD45RA-CD90-CD49f+ cells (C4). P values were generated using one-way ANOVA with multiple comparisons on Prism 7.0 (\*,  $p < 0.05$ ; \*\*,  $p < 0.005$ ; \*\*\*,  $p < 0.001$ ).

**Supplementary Figure S5. Flow cytometric analyses for overnight cultured CD133+ cells or C<sub>3</sub>-cytokine-expanded human UCB CD133+ cells**

Representative gating strategy for flow cytometry and sorting: HSC: Lin-CD38-CD34+CD45RA-CD90+CD49f+; HSPC: Lin-CD34+CD133+; MPP: Lin-CD38-CD34+CD45RA-CD90-; LMPP: Lin-CD38-CD34+CD45RA+CD90-; CMP: Lin-CD38+CD34+CD45RA-CD123+; GMP: Lin-CD38+CD34+CD45RA+CD123+; and MEP: Lin-CD38+CD34+CD45RA-CD123-. All gating was determined by FMO (Fluorescence Minus One).

Supplementary Fig. S1. Watt. 2018. TOP.

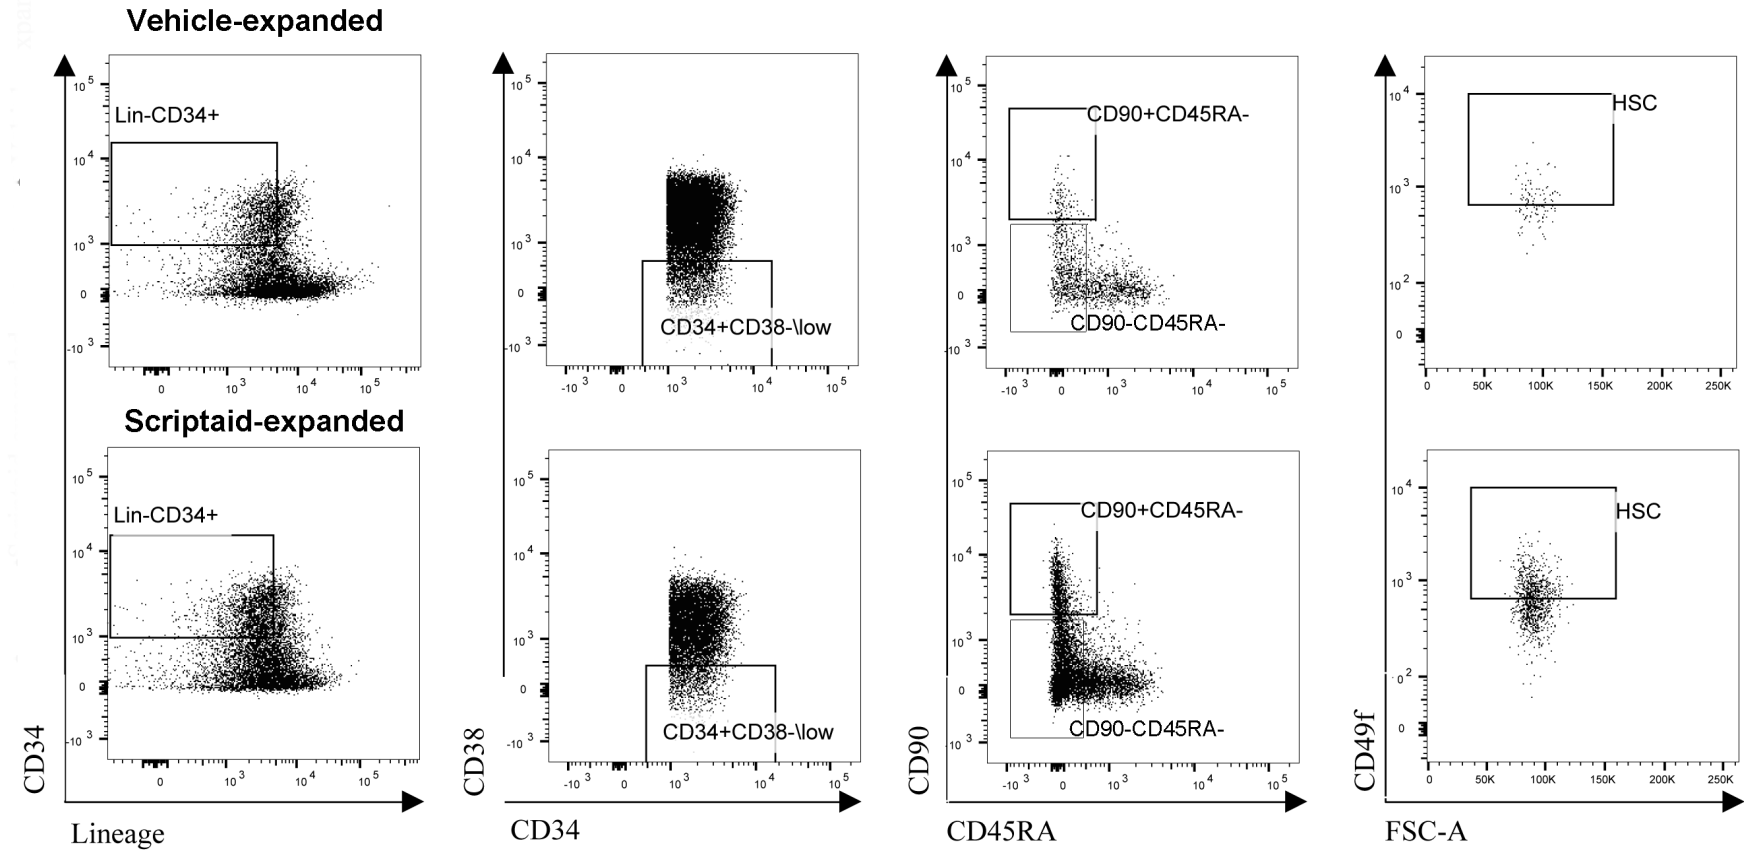



Supplementary Figure S2 Watt. 2018. TOP.

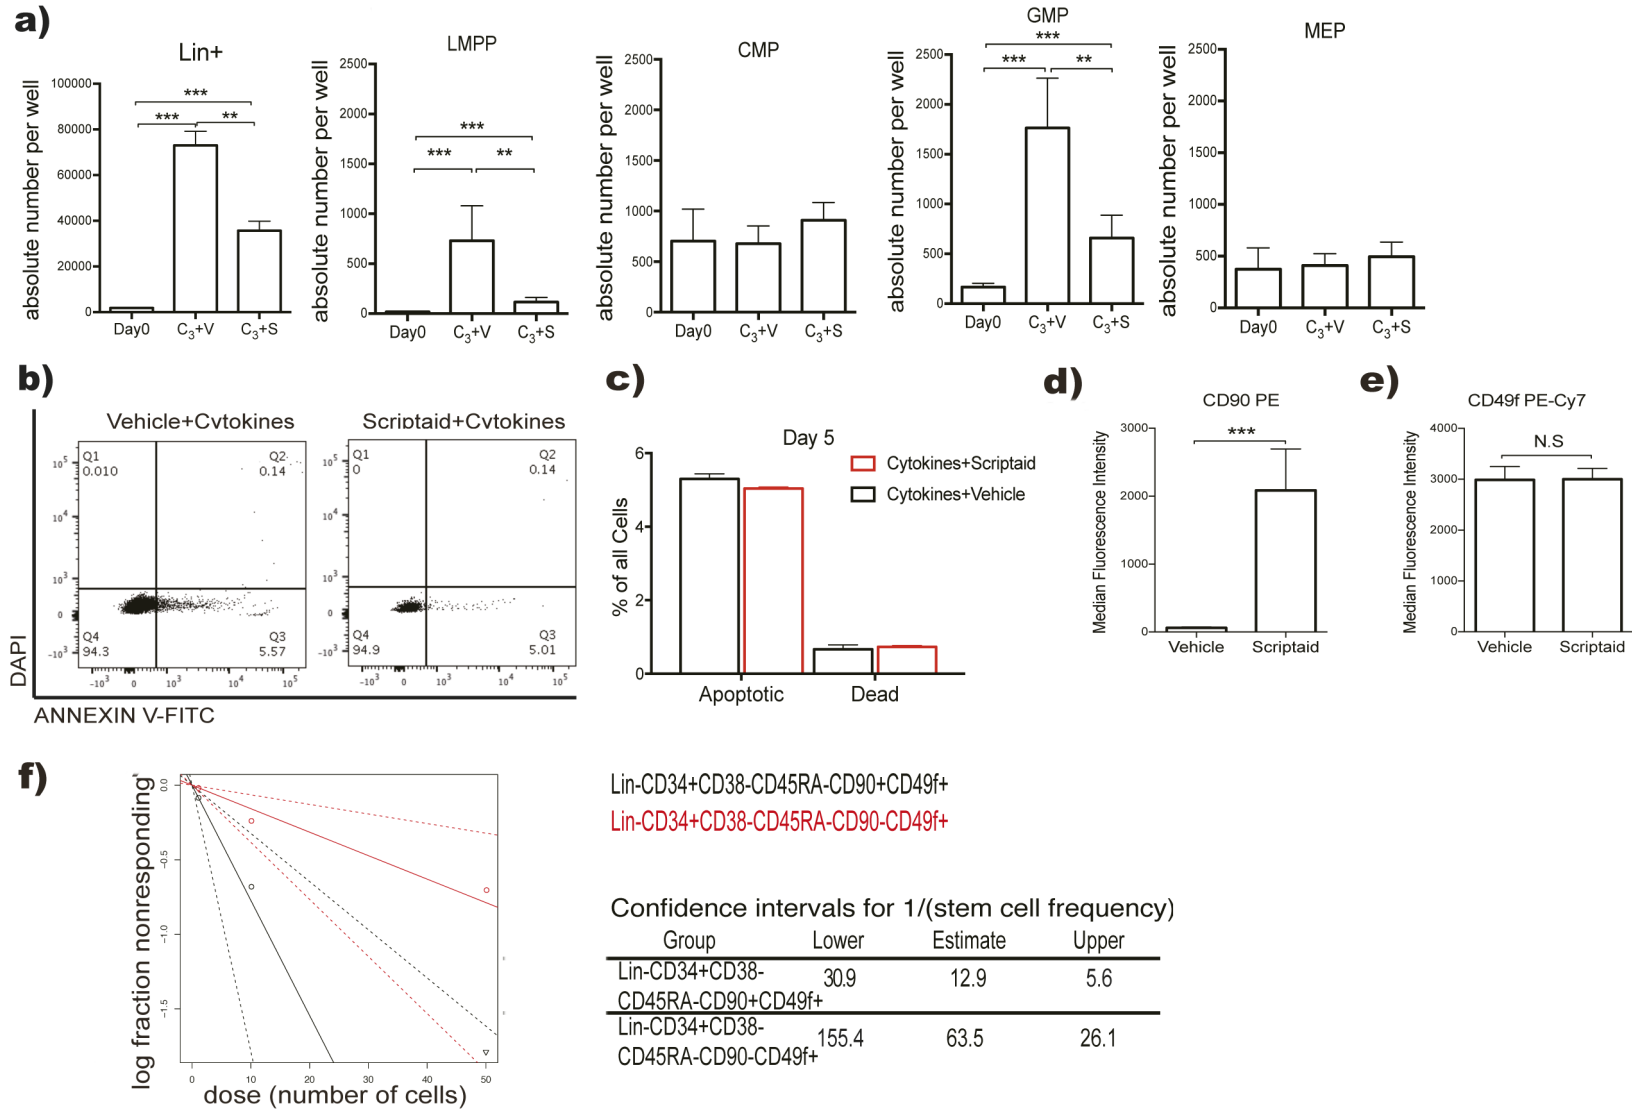

Supplementary Figure S3 Watt. 2018. TOP.

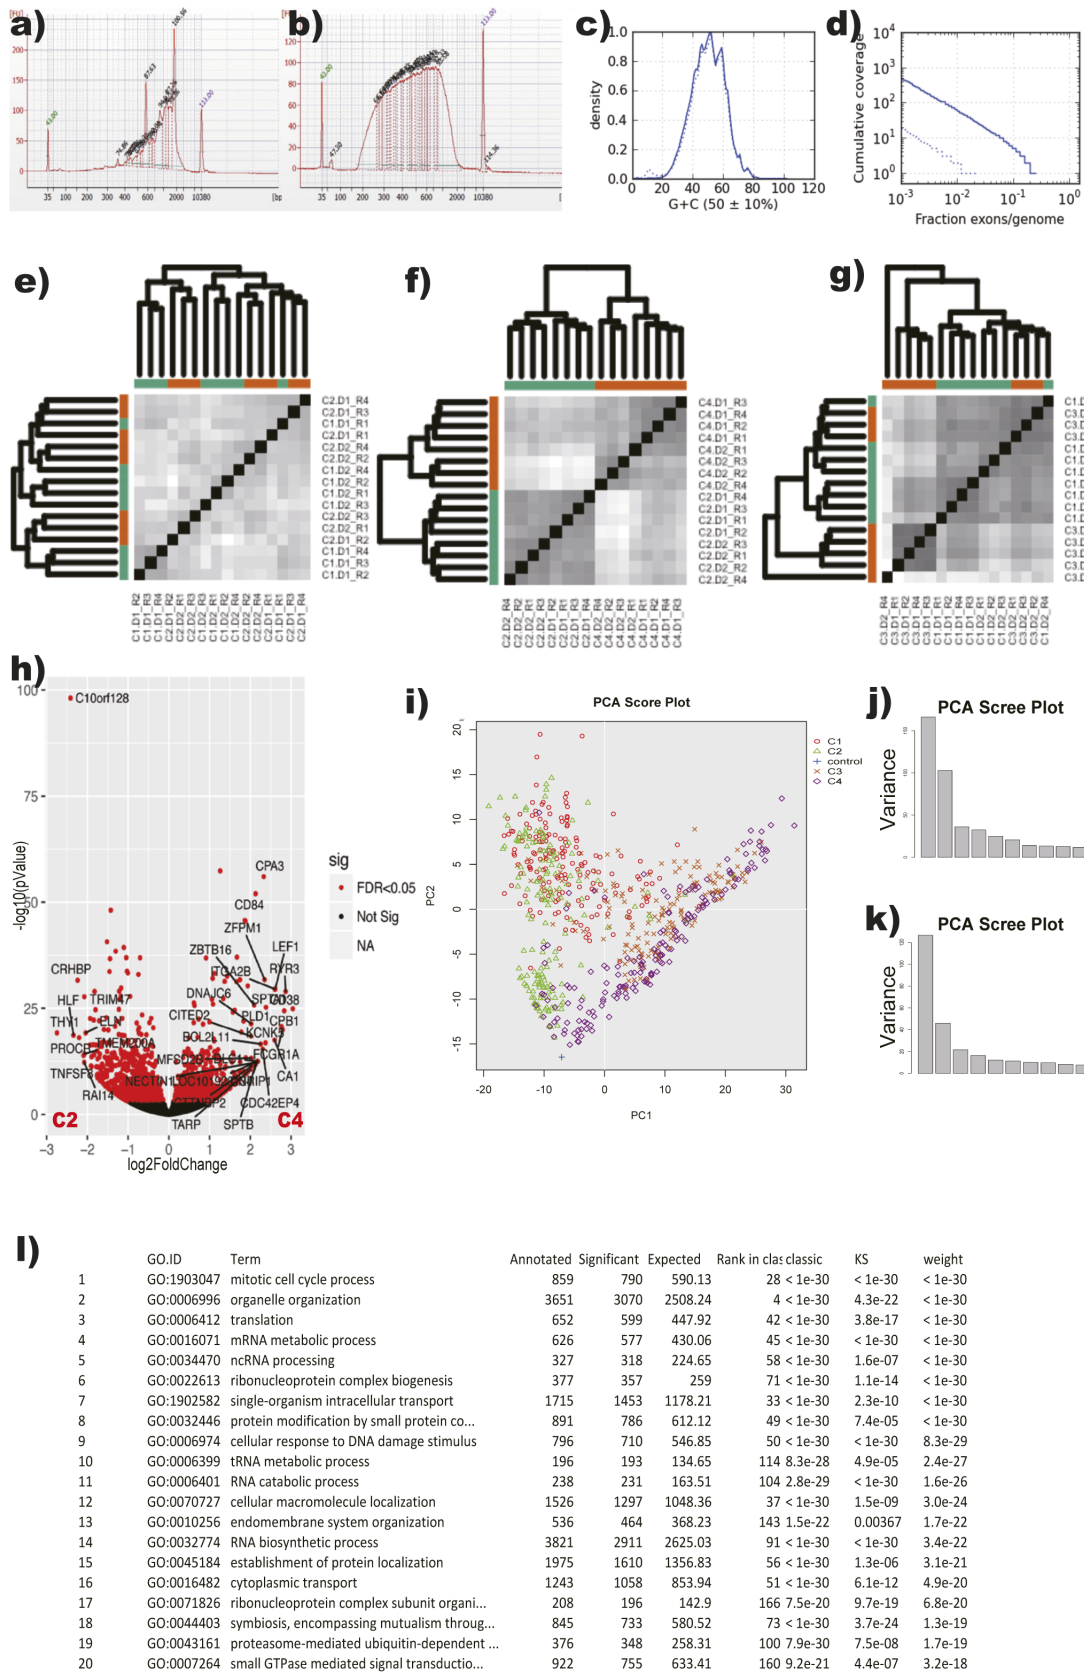

**Supplementary Figure S4.1 Watt. 2018. TOP.**

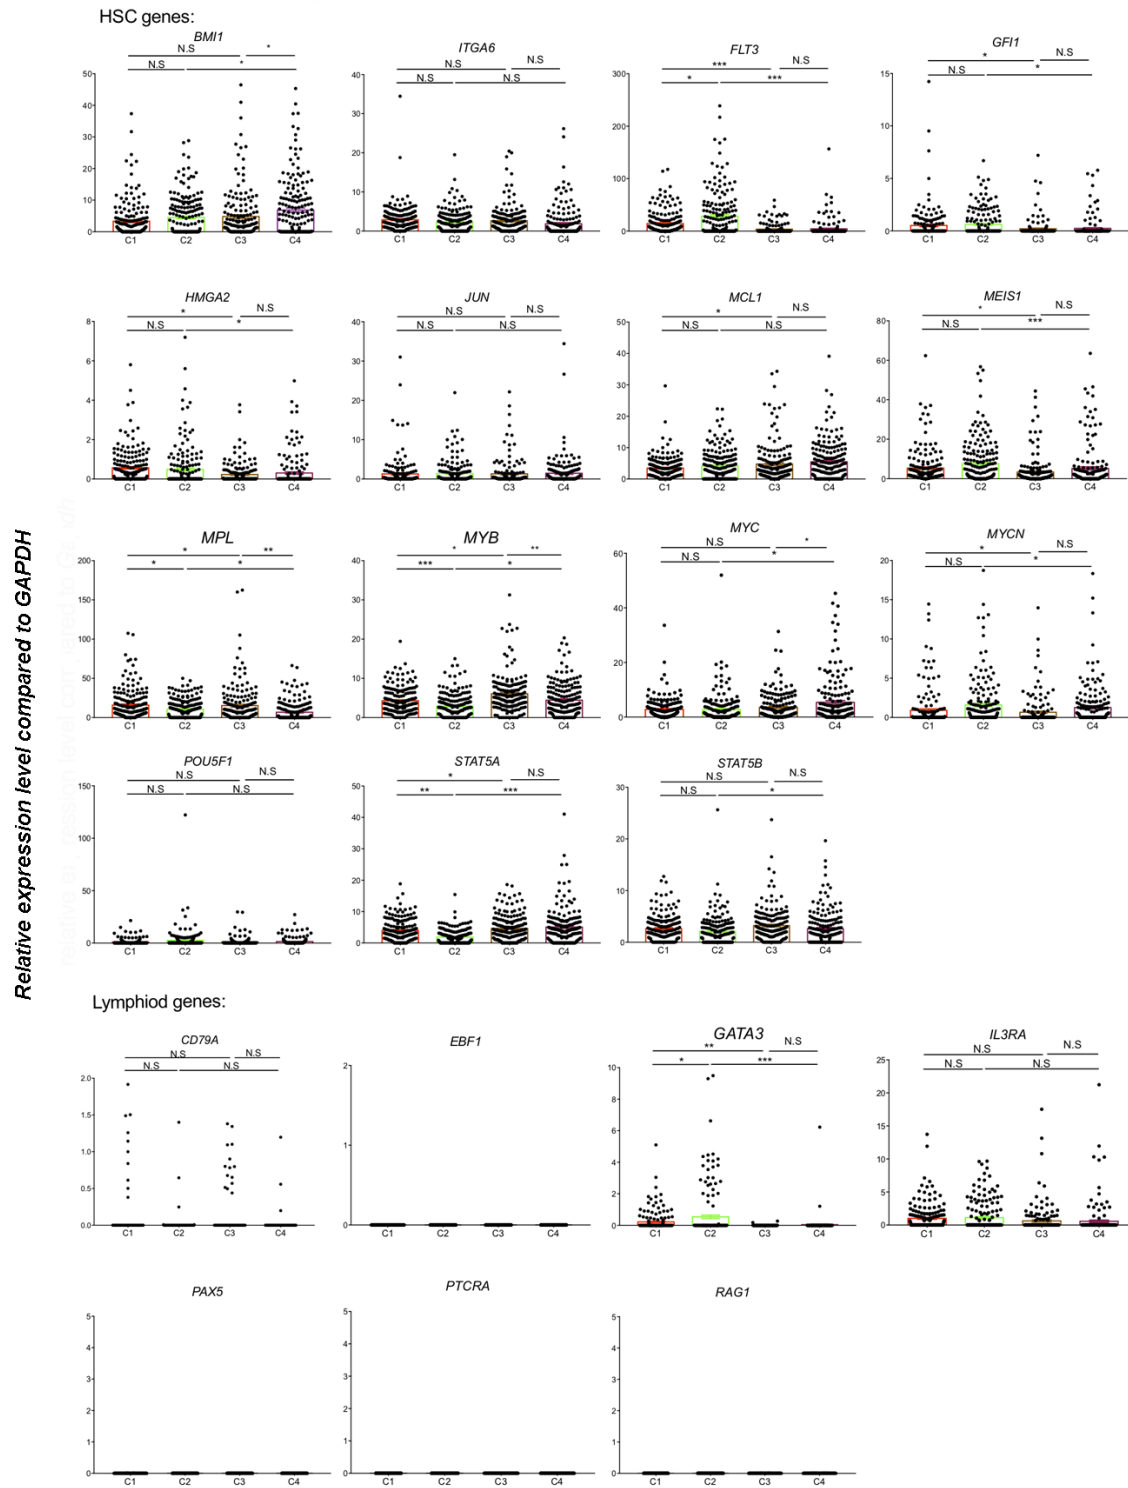

Supplementary Figure S4.2 Watt. 2018. TOP.

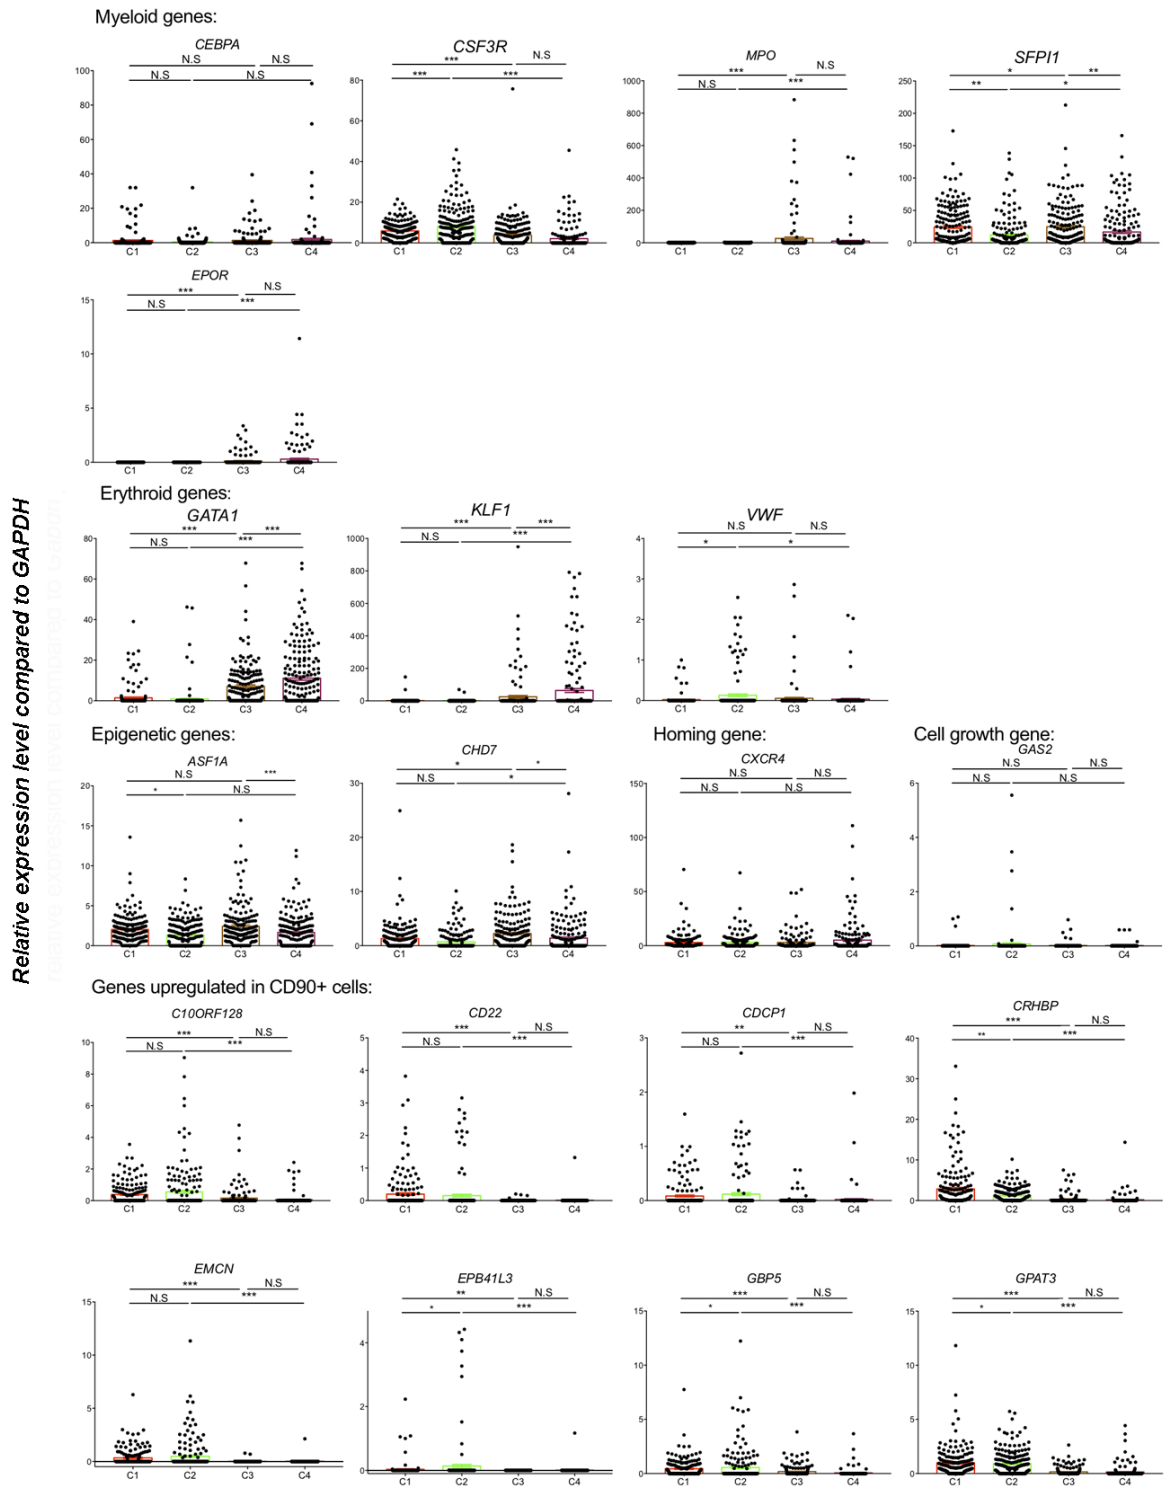

## Supplementary Figure S4.3 Watt. 2018. TOP.

Genes upregulated in CD90+ cells:

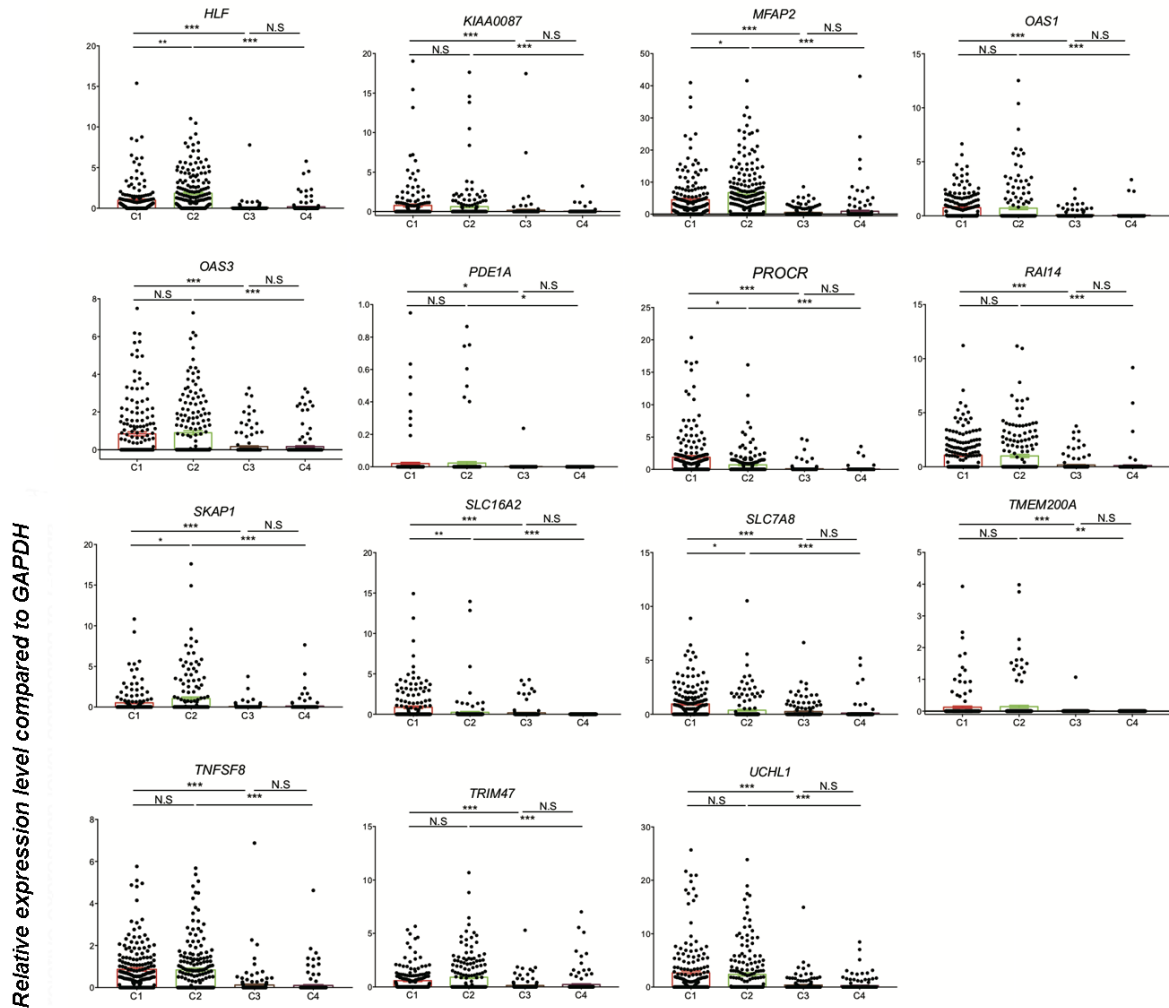

Genes upregulated in CD90- cells:

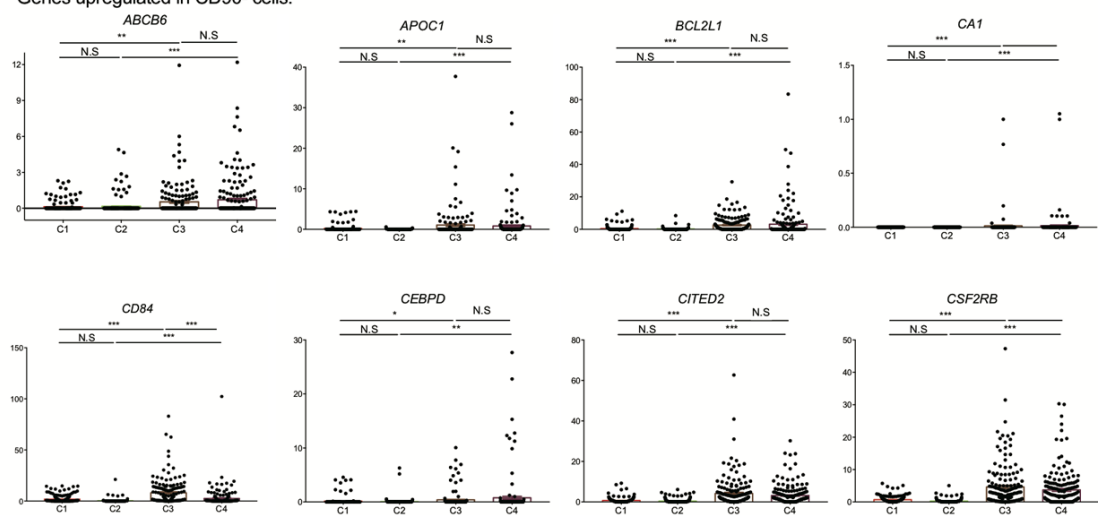

## Supplementary Figure S4.4 Watt. TOP.

Genes upregulated in CD90<sup>+</sup> cells:

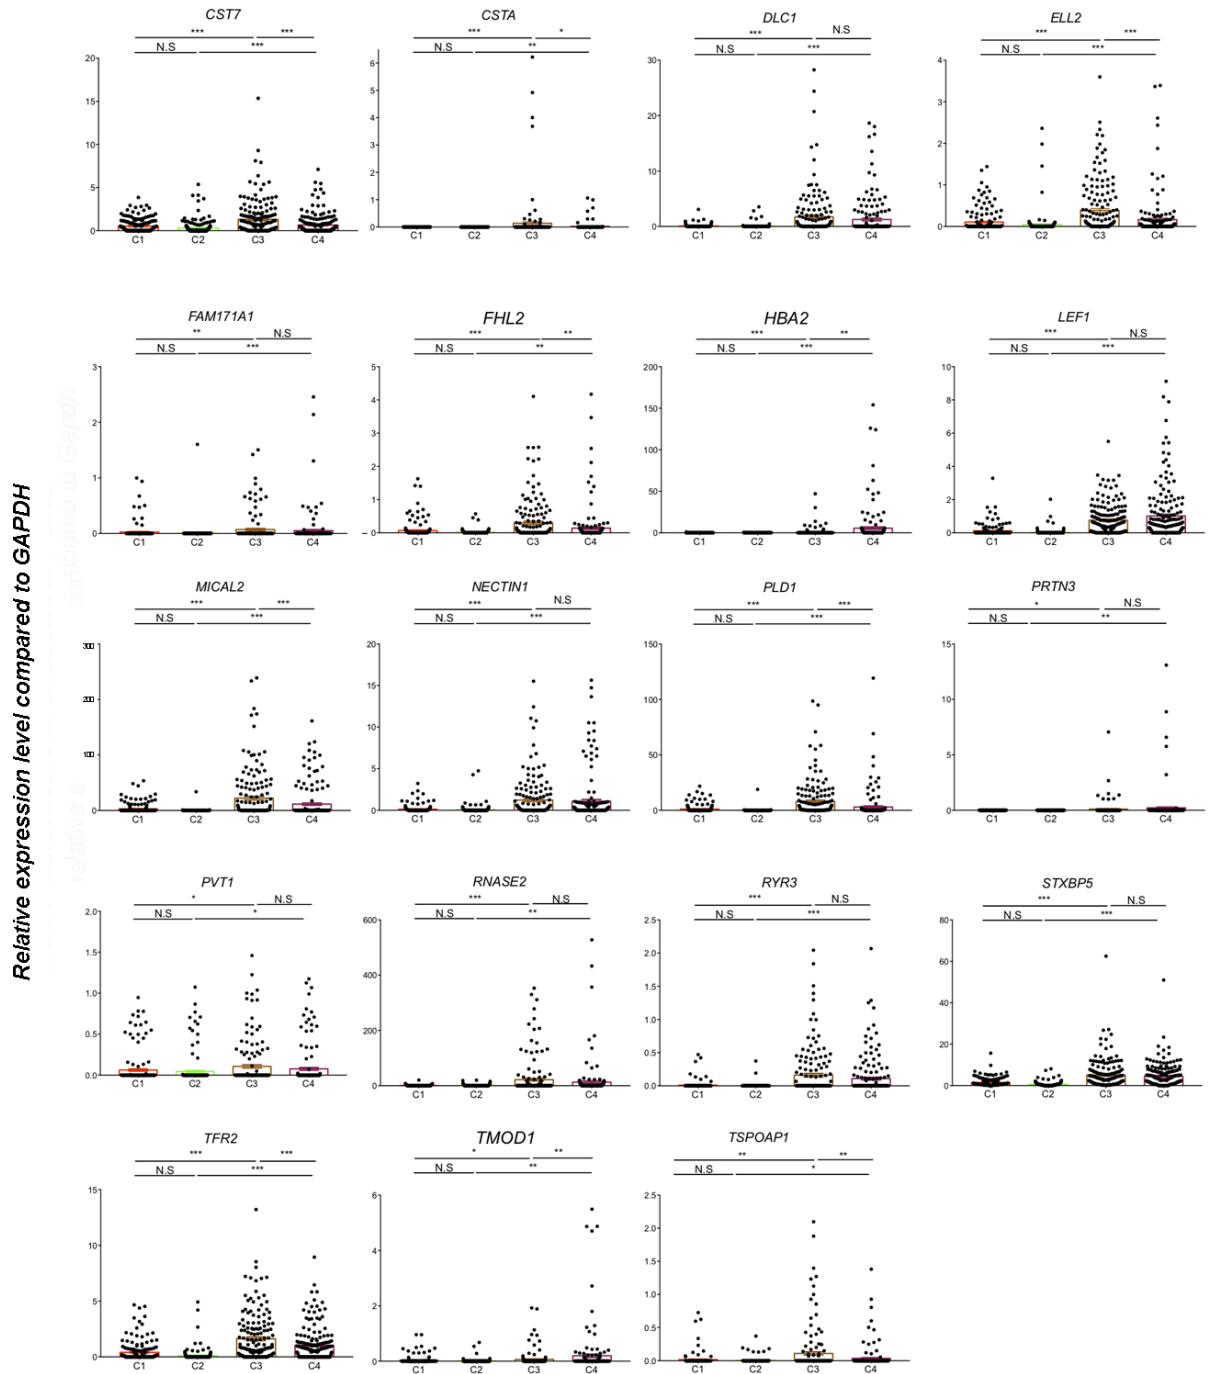

Supplementary Figure S5. Watt. 2018. TOP.

**Overnight-cultured UCB CD133+ cells (single live cells)**

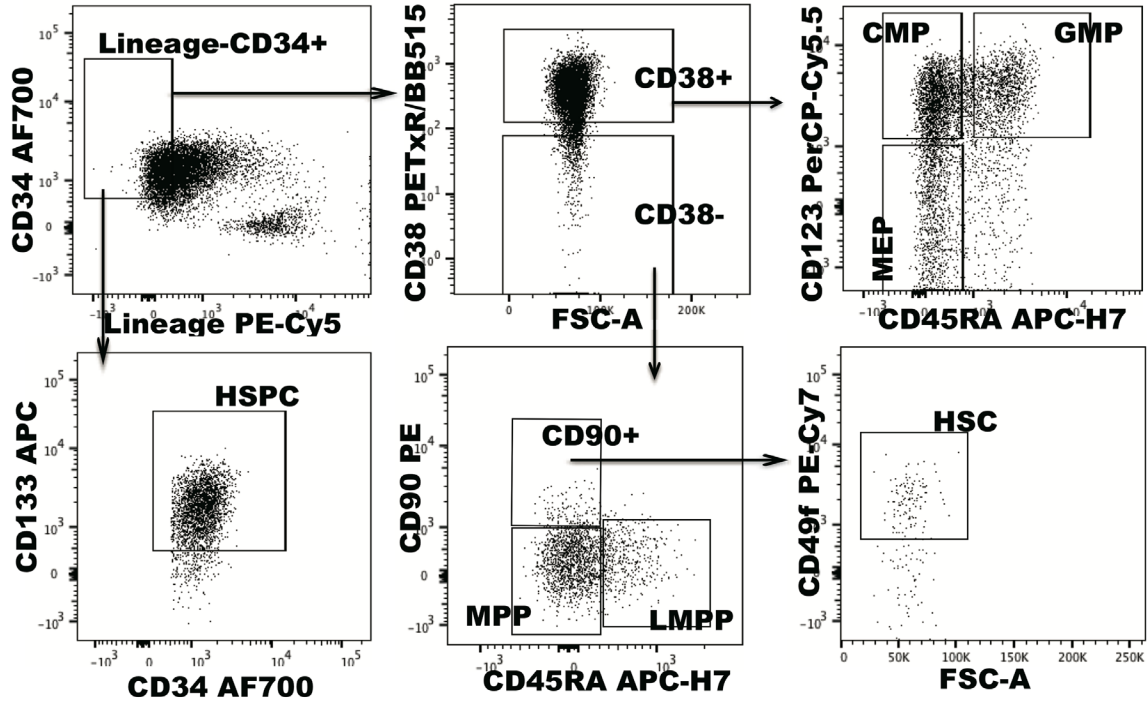

**Cytokines-expanded UCB CD133+ cells (single live cells from one well)**

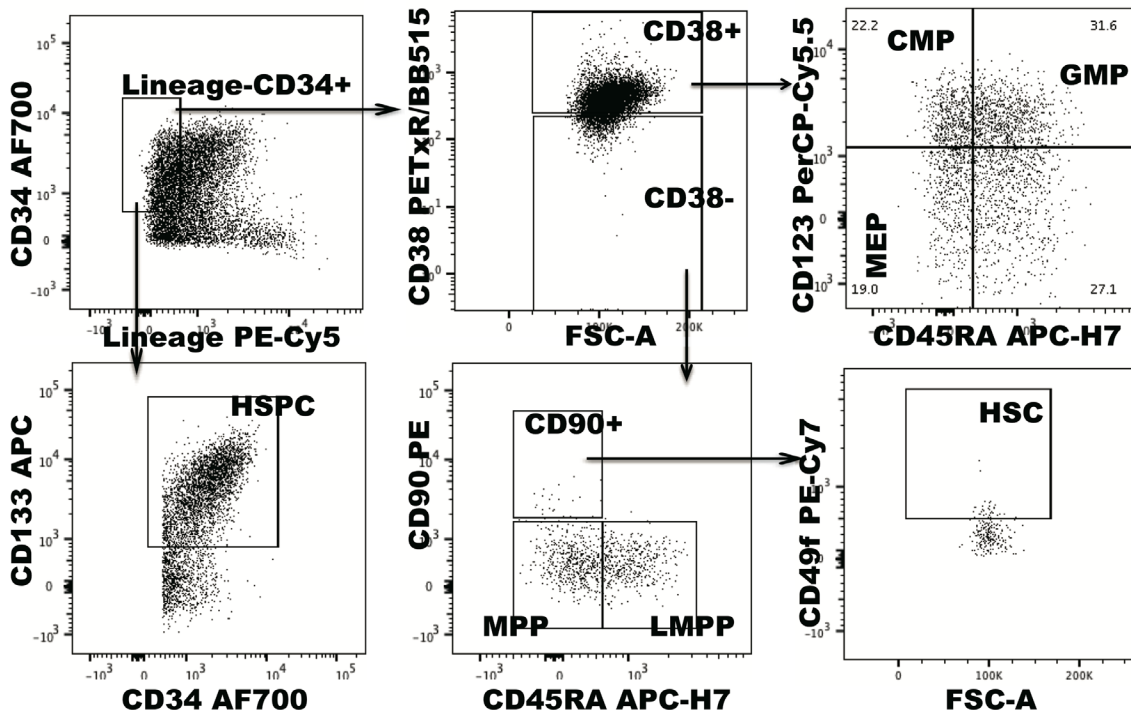

Supplement: 41598_2019_41803_MOESM1_ESM.pdf [file 41598_2019_41803_MOESM1_ESM.pdf]
